# Supplementary material for: Systematic proteomic analysis of human hepotacellular carcinoma cells reveals molecular pathways and networks involved in metastasis
Source: Royal Society of Chemistry journal article supplement (doi:10.1039/c0mb00265h), 2011-04-06
Supplement: c0mb00265h.pdf [file c0mb00265h.pdf]

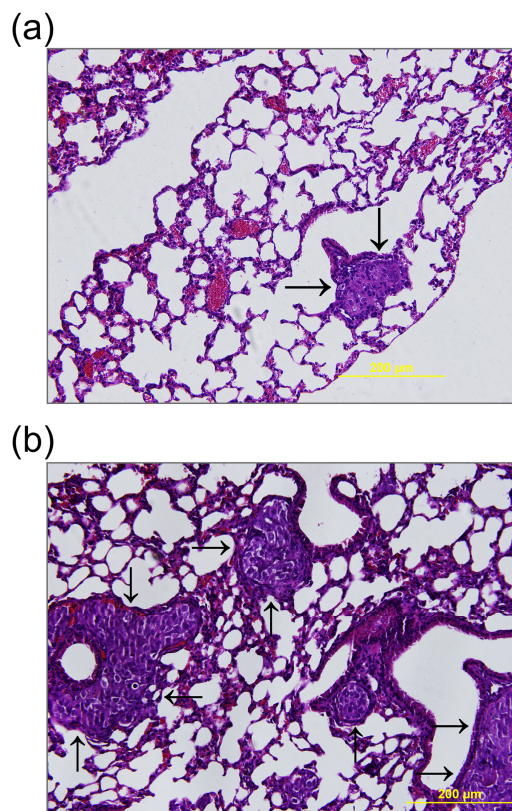

Fig. S1 Spontaneous metastasis assays of MHCC97H and HCCLM3 via orthotopic implantation.

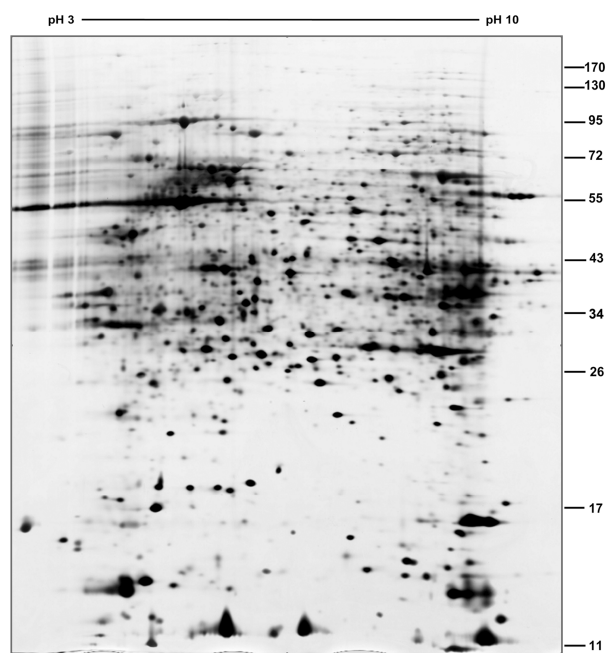

Fig. S2 MHCC97L\_1

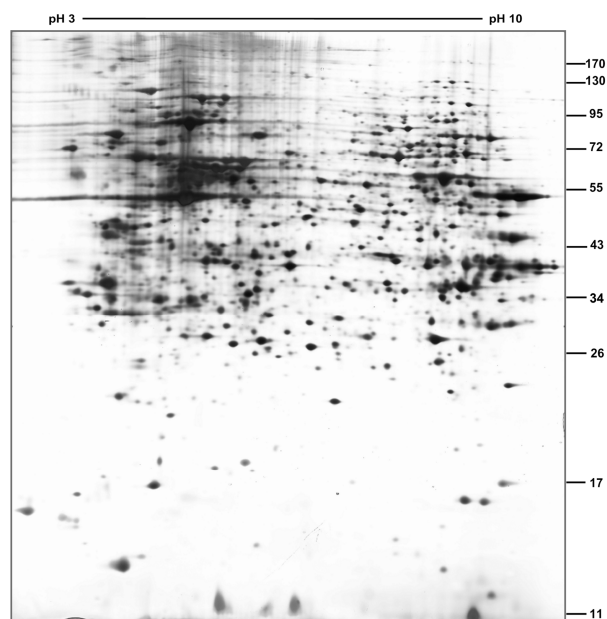

Fig. S3 MHCC97H\_1

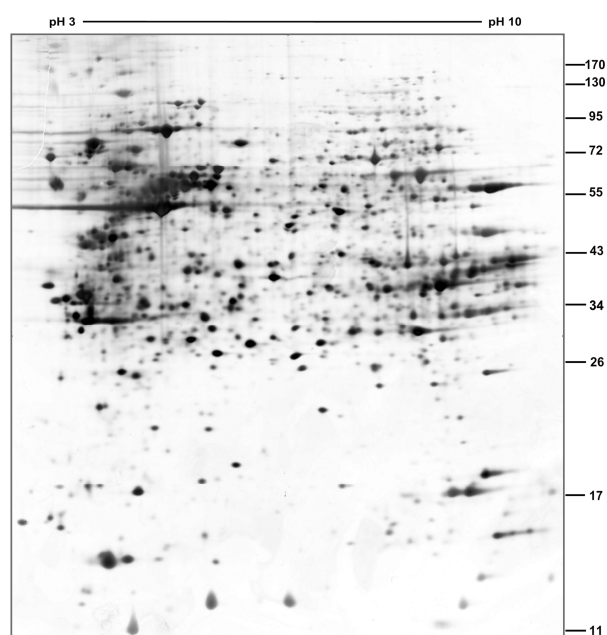

Fig. S4 HCCLM3\_1

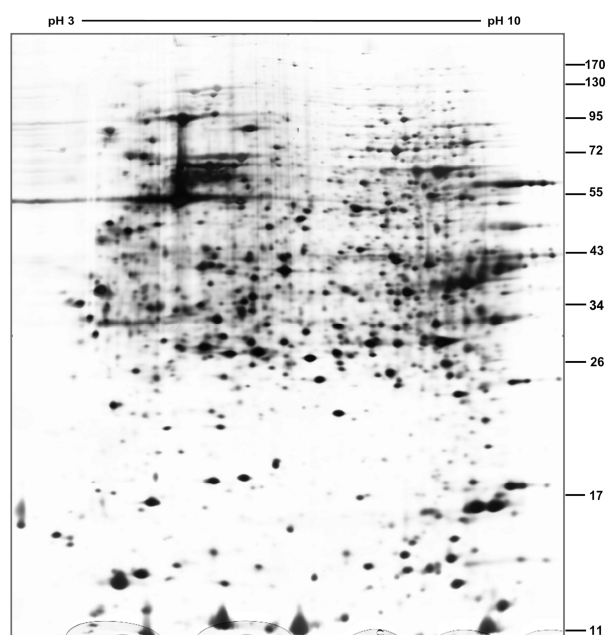

Fig. S5 HCCLM6\_1

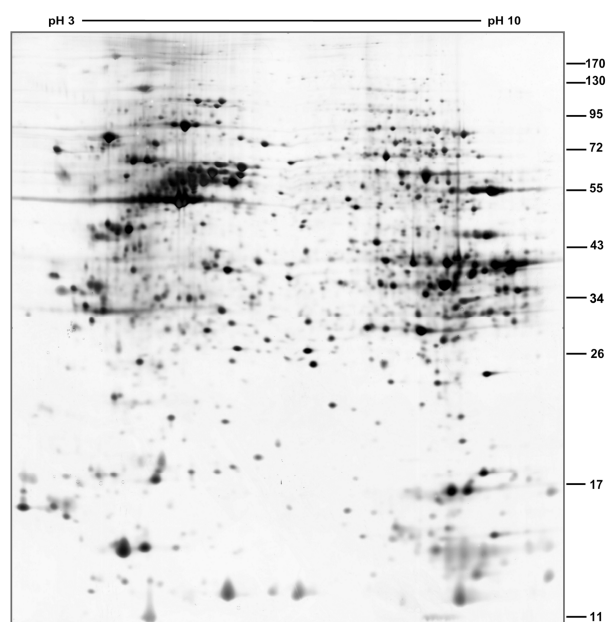

Fig. S6 MHCC97L\_2

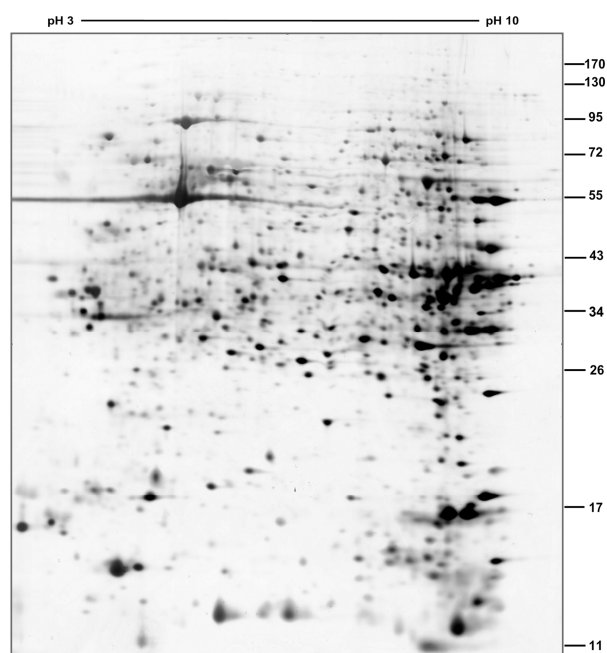

Fig. S7 MHCC97H\_2

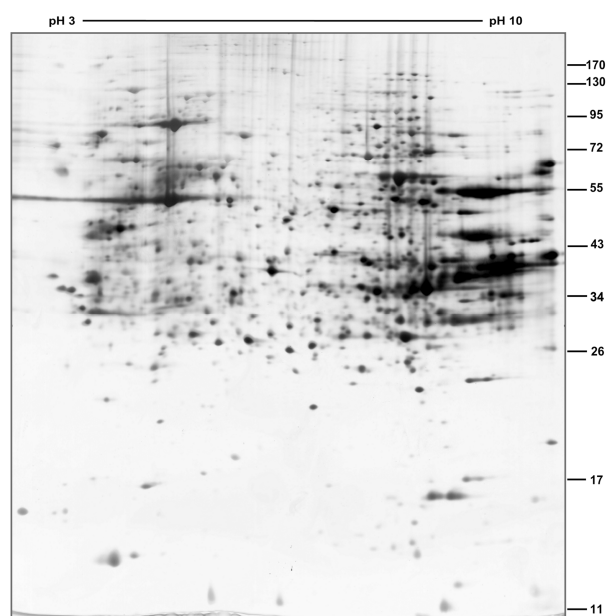

Fig. S8 HCCLM3\_2



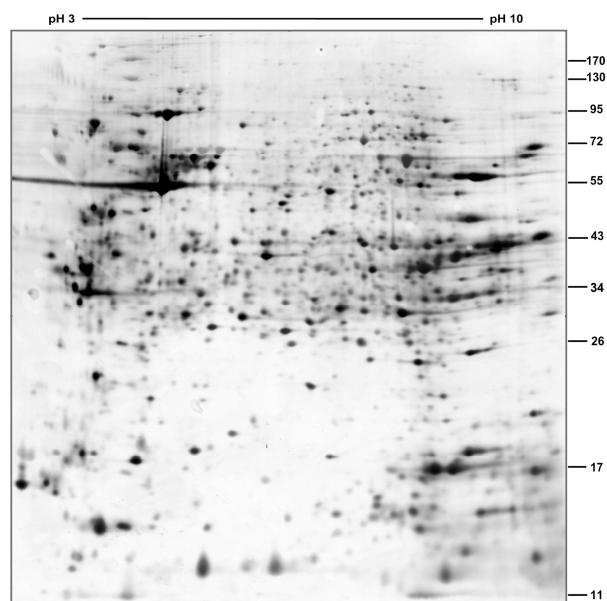

Fig. S9 HCCLM6\_2

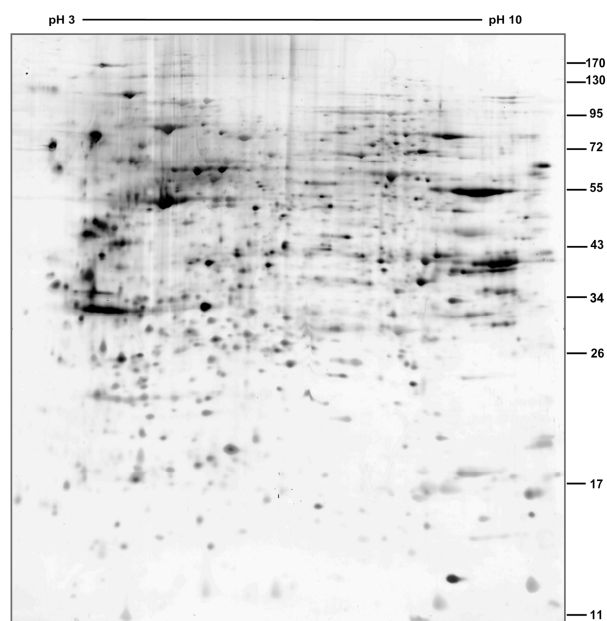

Fig. S10 HMCC97L\_3

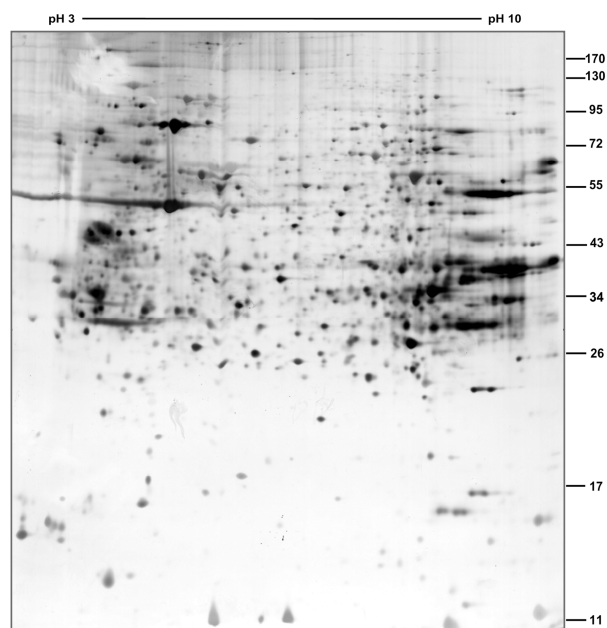

Fig. S11 MHCC97H\_3

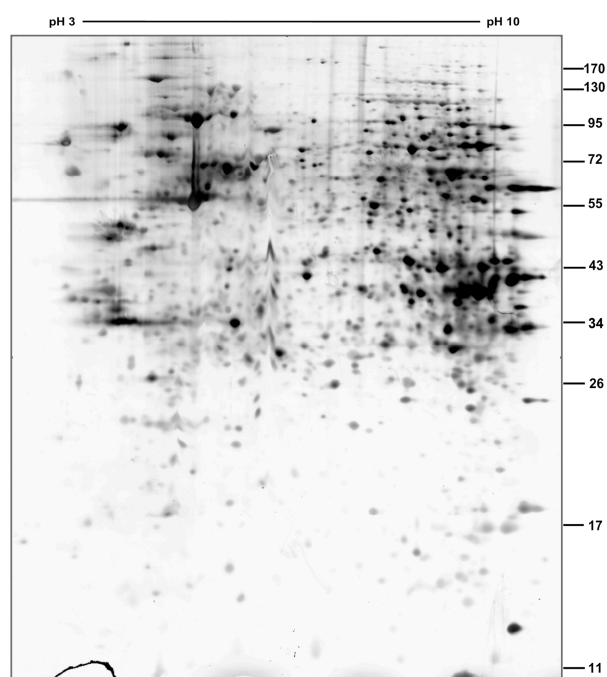

Fig. S12 HCCLM3\_3

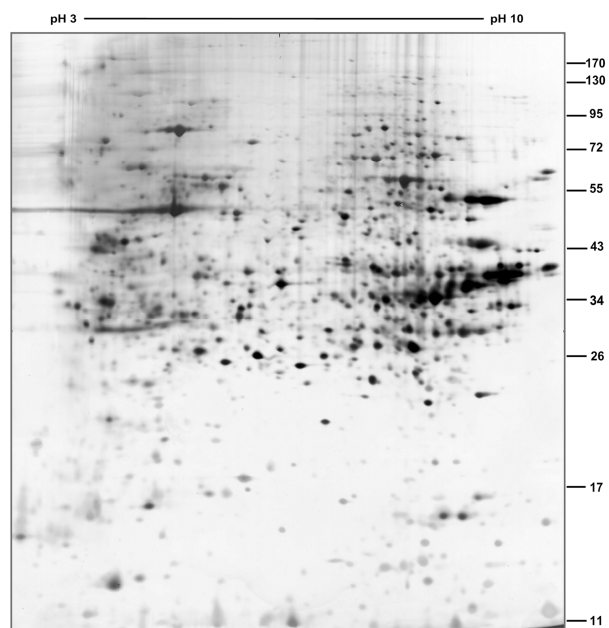

Fig. S13 HCCLM6\_3
